# Supplementary material for: Extraction and Quantification of Bioactive Tyrian Purple Precursors: A Comparative and Validation Study from the Hypobranchial Gland of a Muricid Dicathais orbita
Source: MDPI journal article supplement (doi:10.3390/molecules21121672), 2016-12-05
Supplement: s1 [file s1]

# Supplementary Materials: Extraction and Quantification of Bioactive Tyrian Purple Precursors: A Comparative and Validation Study from the Hypobranchial Gland of a Muricid *Dicathais orbita*

Roselyn Valles-Regino, Peter Mouatt, David Rudd, Lachlan H. Yee, and Kirsten Benkendorff

**Table S1.** Mean ( $\pm$ SD) weight of precursor compound as a proportion of the total extract weight (mg/mg) and weight of wet hypobranchial tissue prior to extraction ( $n = 4$ ).

| Compound                          | Dry Extract (mg/mg) |                   | Wet Tissue (mg/mg) |                   |
|-----------------------------------|---------------------|-------------------|--------------------|-------------------|
|                                   | 5 mL                | 10 mL             | 5 mL               | 10 mL             |
| (1) Murexine                      | 0.317 $\pm$ 0.197   | 0.213 $\pm$ 0.148 | 0.047 $\pm$ 0.018  | 0.031 $\pm$ 0.014 |
| (2) Tyrindoxyl sulphate           | 0.179 $\pm$ 0.113   | 0.126 $\pm$ 0.089 | 0.026 $\pm$ 0.010  | 0.018 $\pm$ 0.009 |
| (3) Tyrindoxyl <i>O</i> -sulphate | <LOD                | <LOD              | <LOD               | <LOD              |
| (5) Tyrindoleninone               | 0.006 $\pm$ 0.002   | 0.007 $\pm$ 0.000 | 0.001 $\pm$ 0.000  | 0.001 $\pm$ 0.000 |
| (6) 6-Bromoisatin                 | 0.008 $\pm$ 0.005   | 0.008 $\pm$ 0.004 | 0.001 $\pm$ 0.000  | 0.001 $\pm$ 0.000 |
| (8) Tyriverdin                    | 0.001 $\pm$ 0.000   | <LOD              | <0.001 $\pm$ 0.000 | <LOD              |

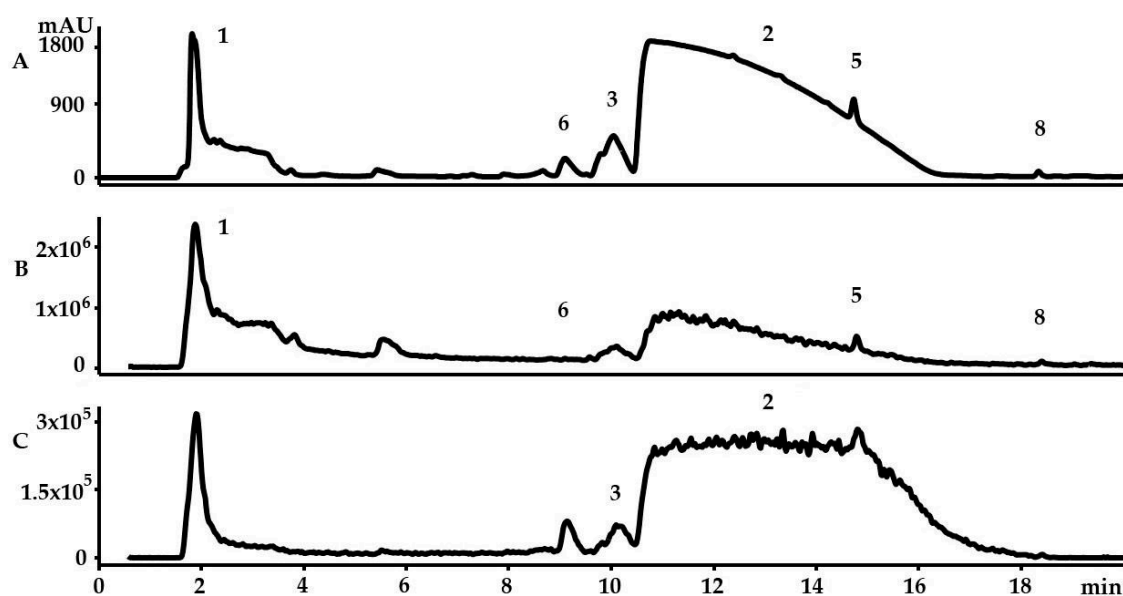

**Figure S1.** Representative chromatograms of the ethanol extract from the hypobranchial gland of *Dicathais orbita*: (A) UV-Vis spectra; (B) positive and; (C) negative chemical ionisation (CI) mass spectra (TIC) showing the bioactive compounds of interest. Peak assignments based on Figure 1 are as follows: (1) murexine, (2) tyrindoxyl sulphate, (3) tyrindoxyl *S*-oxide sulphate, (5) tyrindoleninone, (6) 6-bromoisatin, and (8) tyriverdin.

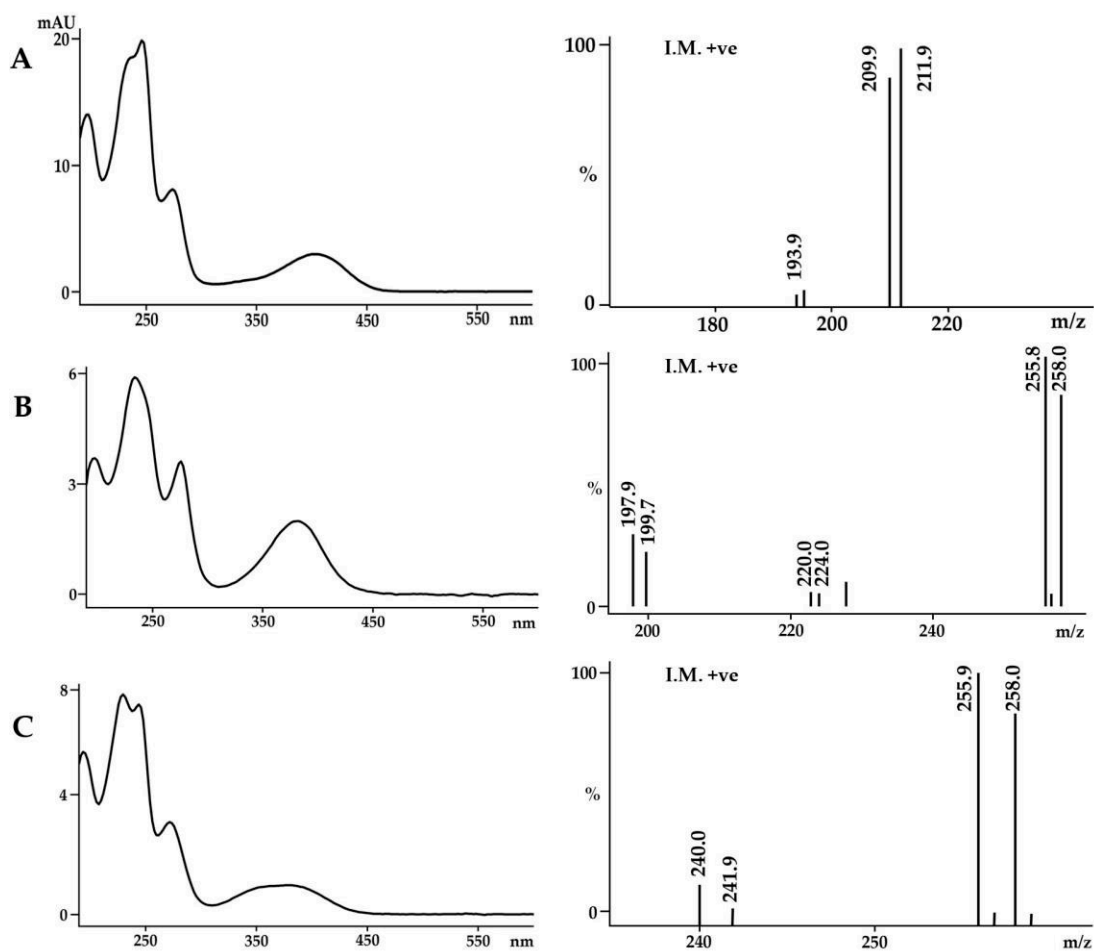

**Figure S2.** UV spectra (left) with mass spectra (right) of unidentified brominated compounds (A) UB1; (B) UB2; and (C) UB3 obtained from bioactive compounds found in the hypobranchial gland chloroform extract of *Dicathais orbita* from high-performance liquid chromatography–mass spectrometry with electrospray ionisation. I.M. ionisation mode: I.M. +ve = positive ions.

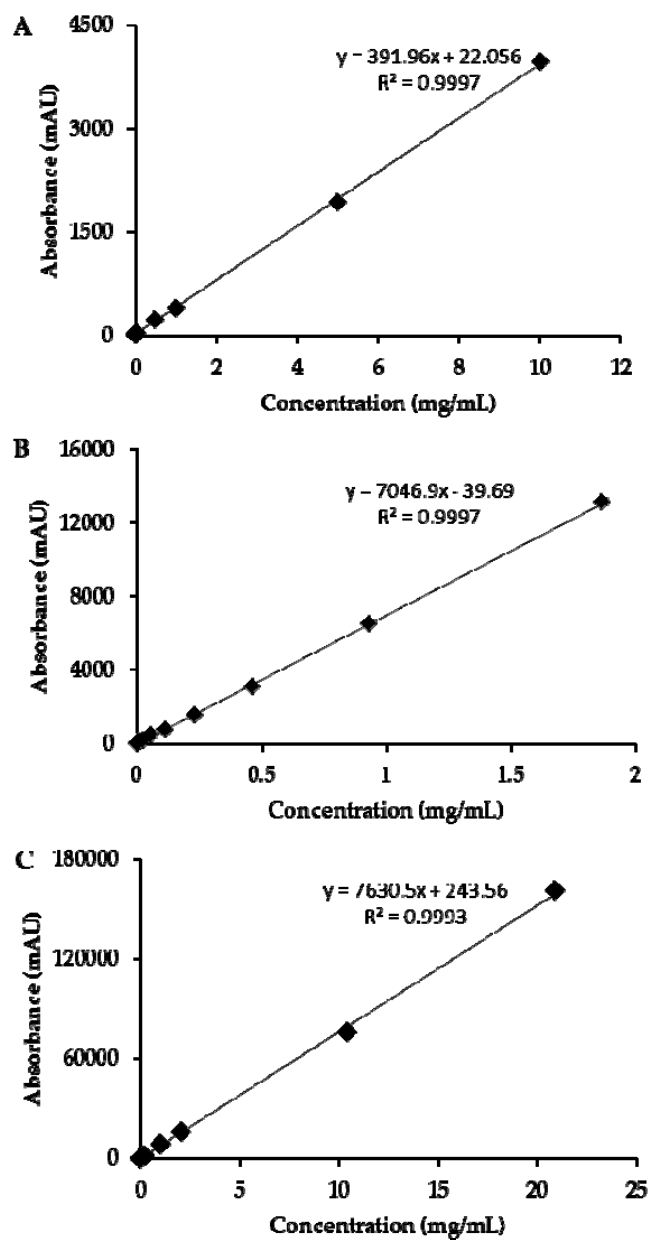

**Figure S3.** Calibration curves of (A) murexine; (B) 6-bromoisatin; and (C) murexine monitored at 210 nm.

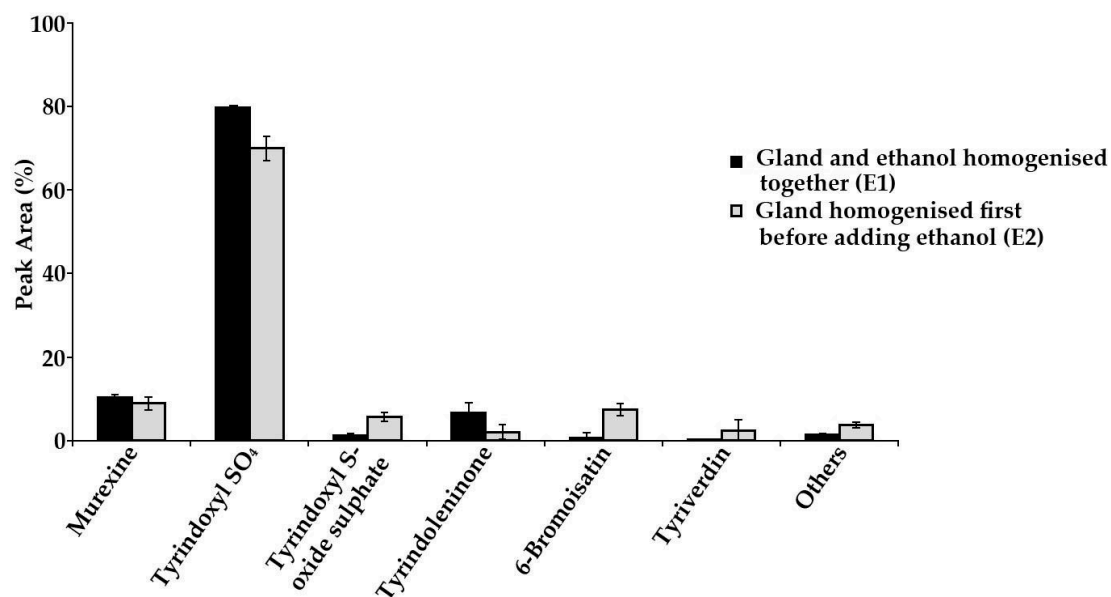

**Figure S4.** Comparison of the composition of the secondary metabolites in *Dicathais orbita* extracts prepared using two different extraction methods. Compounds were identified by high-performance liquid chromatography–mass spectrometry with electrospray ionisation and quantified by relative absorbance at 210 nm.

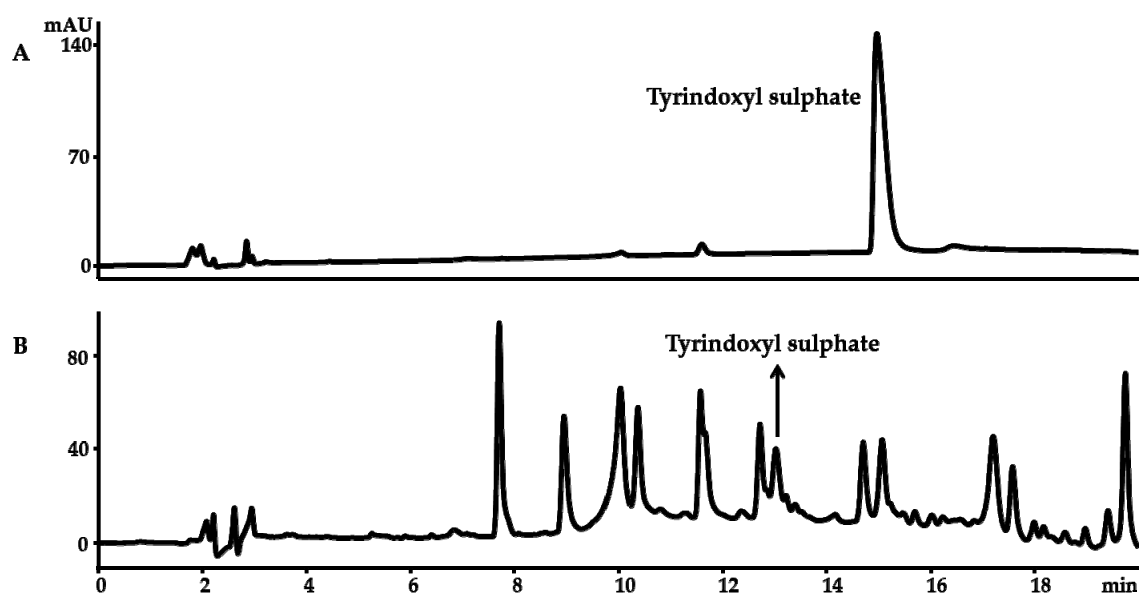

**Figure S5.** Chromatograms of the isolated tyrindoxyl sulphate from the hypobranchial gland of *Dicathais orbita* based on retention time using the high-performance liquid chromatography preparative system: (A) Tyrindoxyl sulphate fraction that was dried in rotary evaporator with the addition of ammonia; (B) tyrindoxyl sulphate fraction dried in rotary evaporator without ammonia.
